# Supplementary material
Source: Springer Nature journal article supplement (https://www.springermedizin.de/resource/supplementary/12885_2009_2018_MOESM9_ESM.pdf/9460322)

E-cadherin

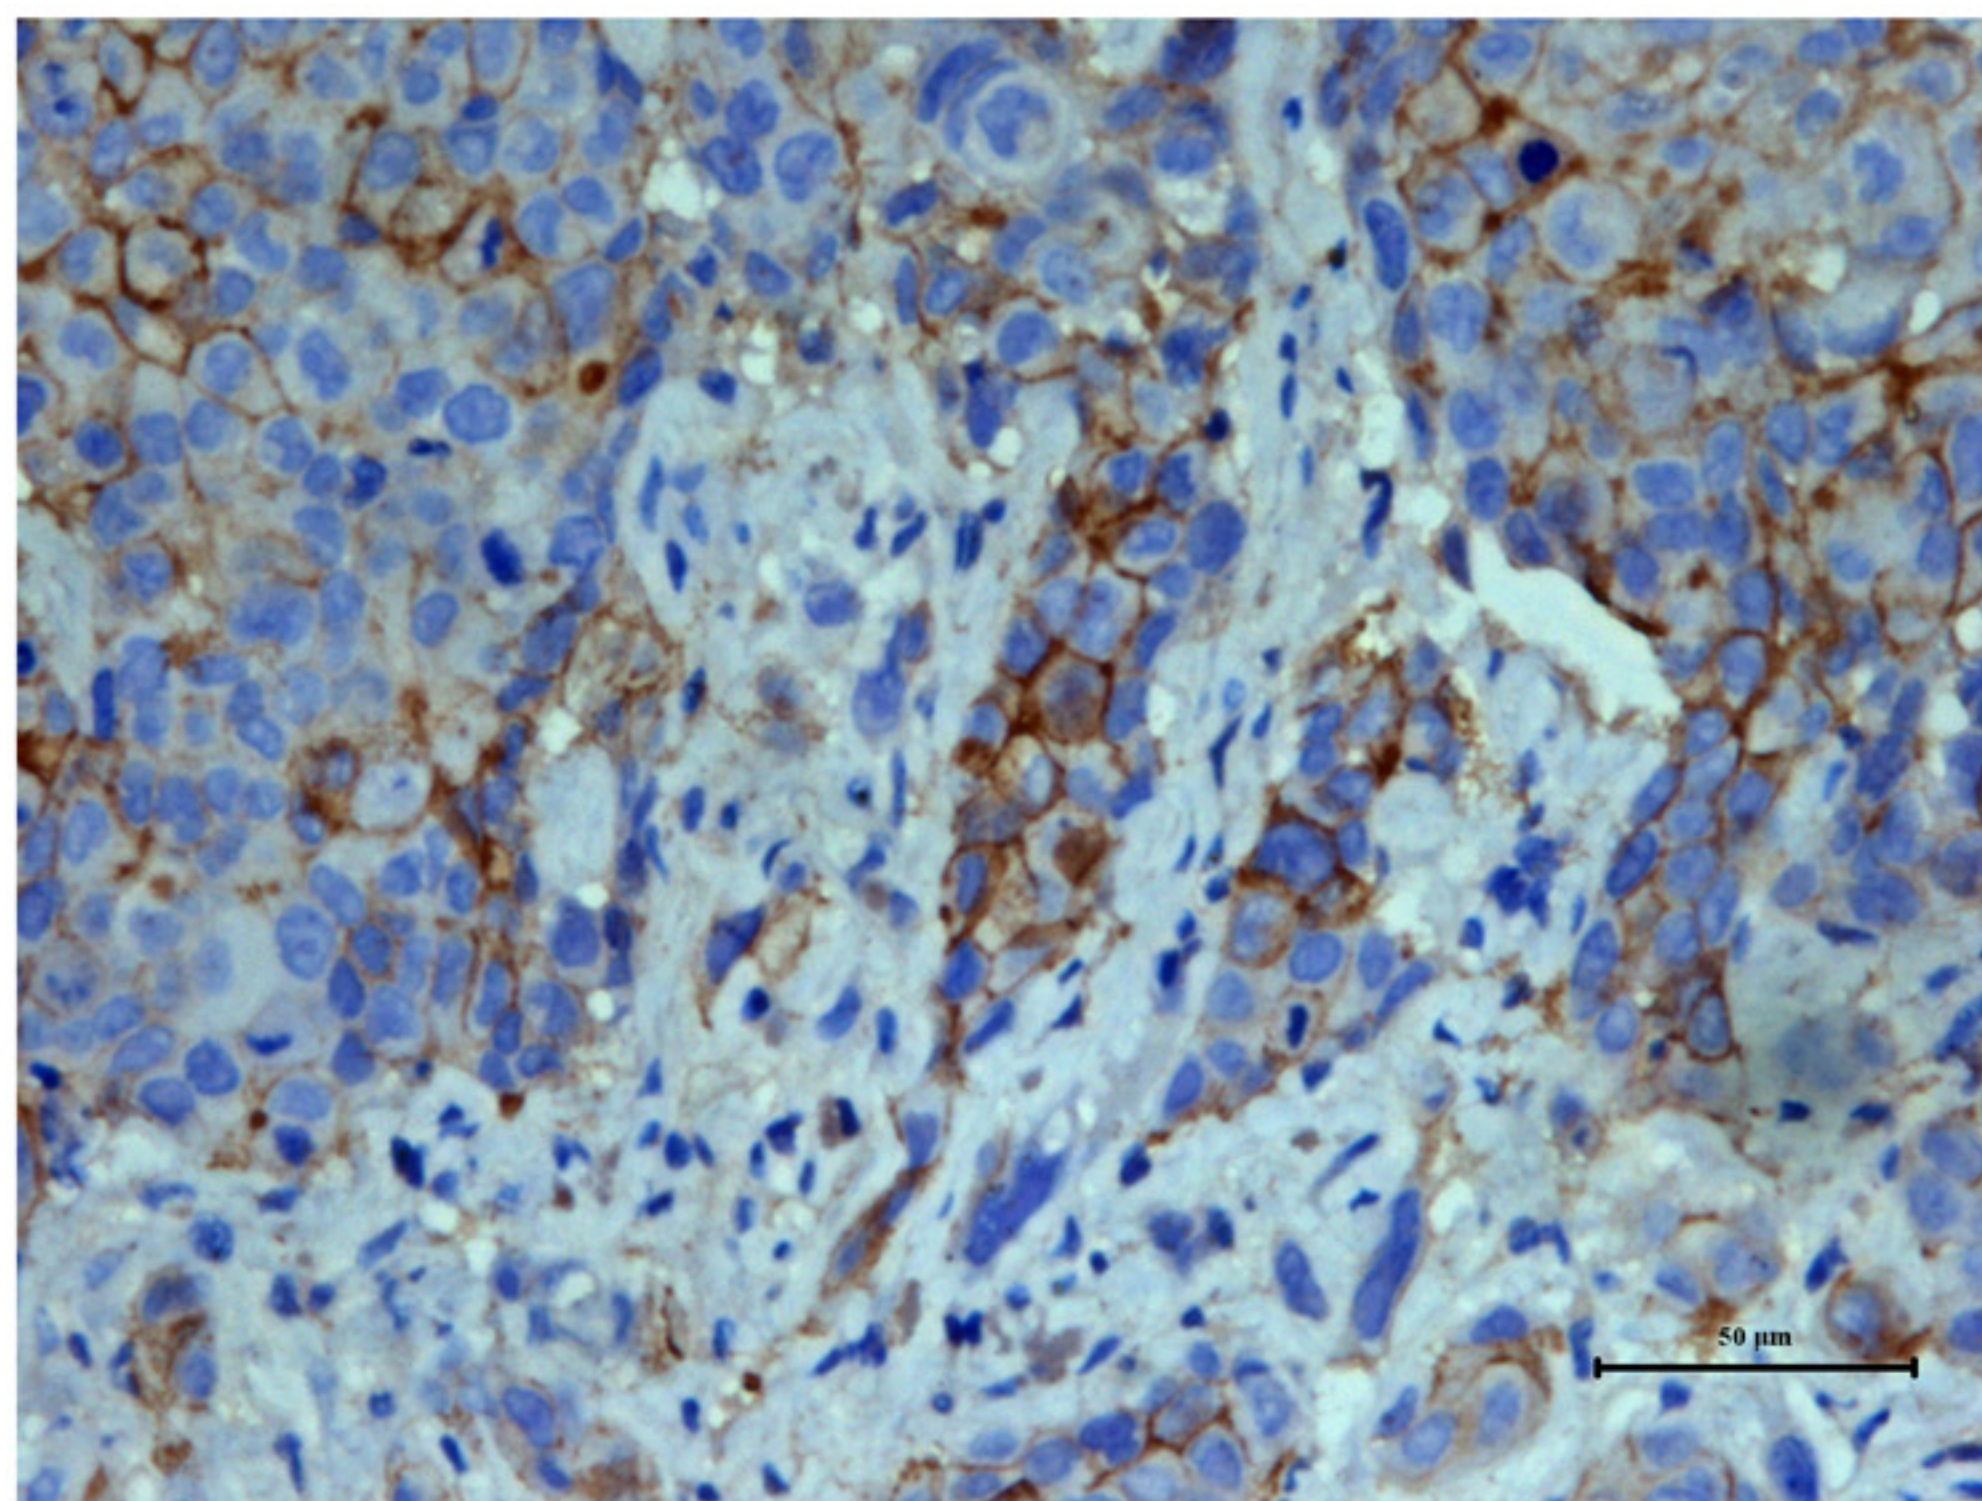

N-cadherin

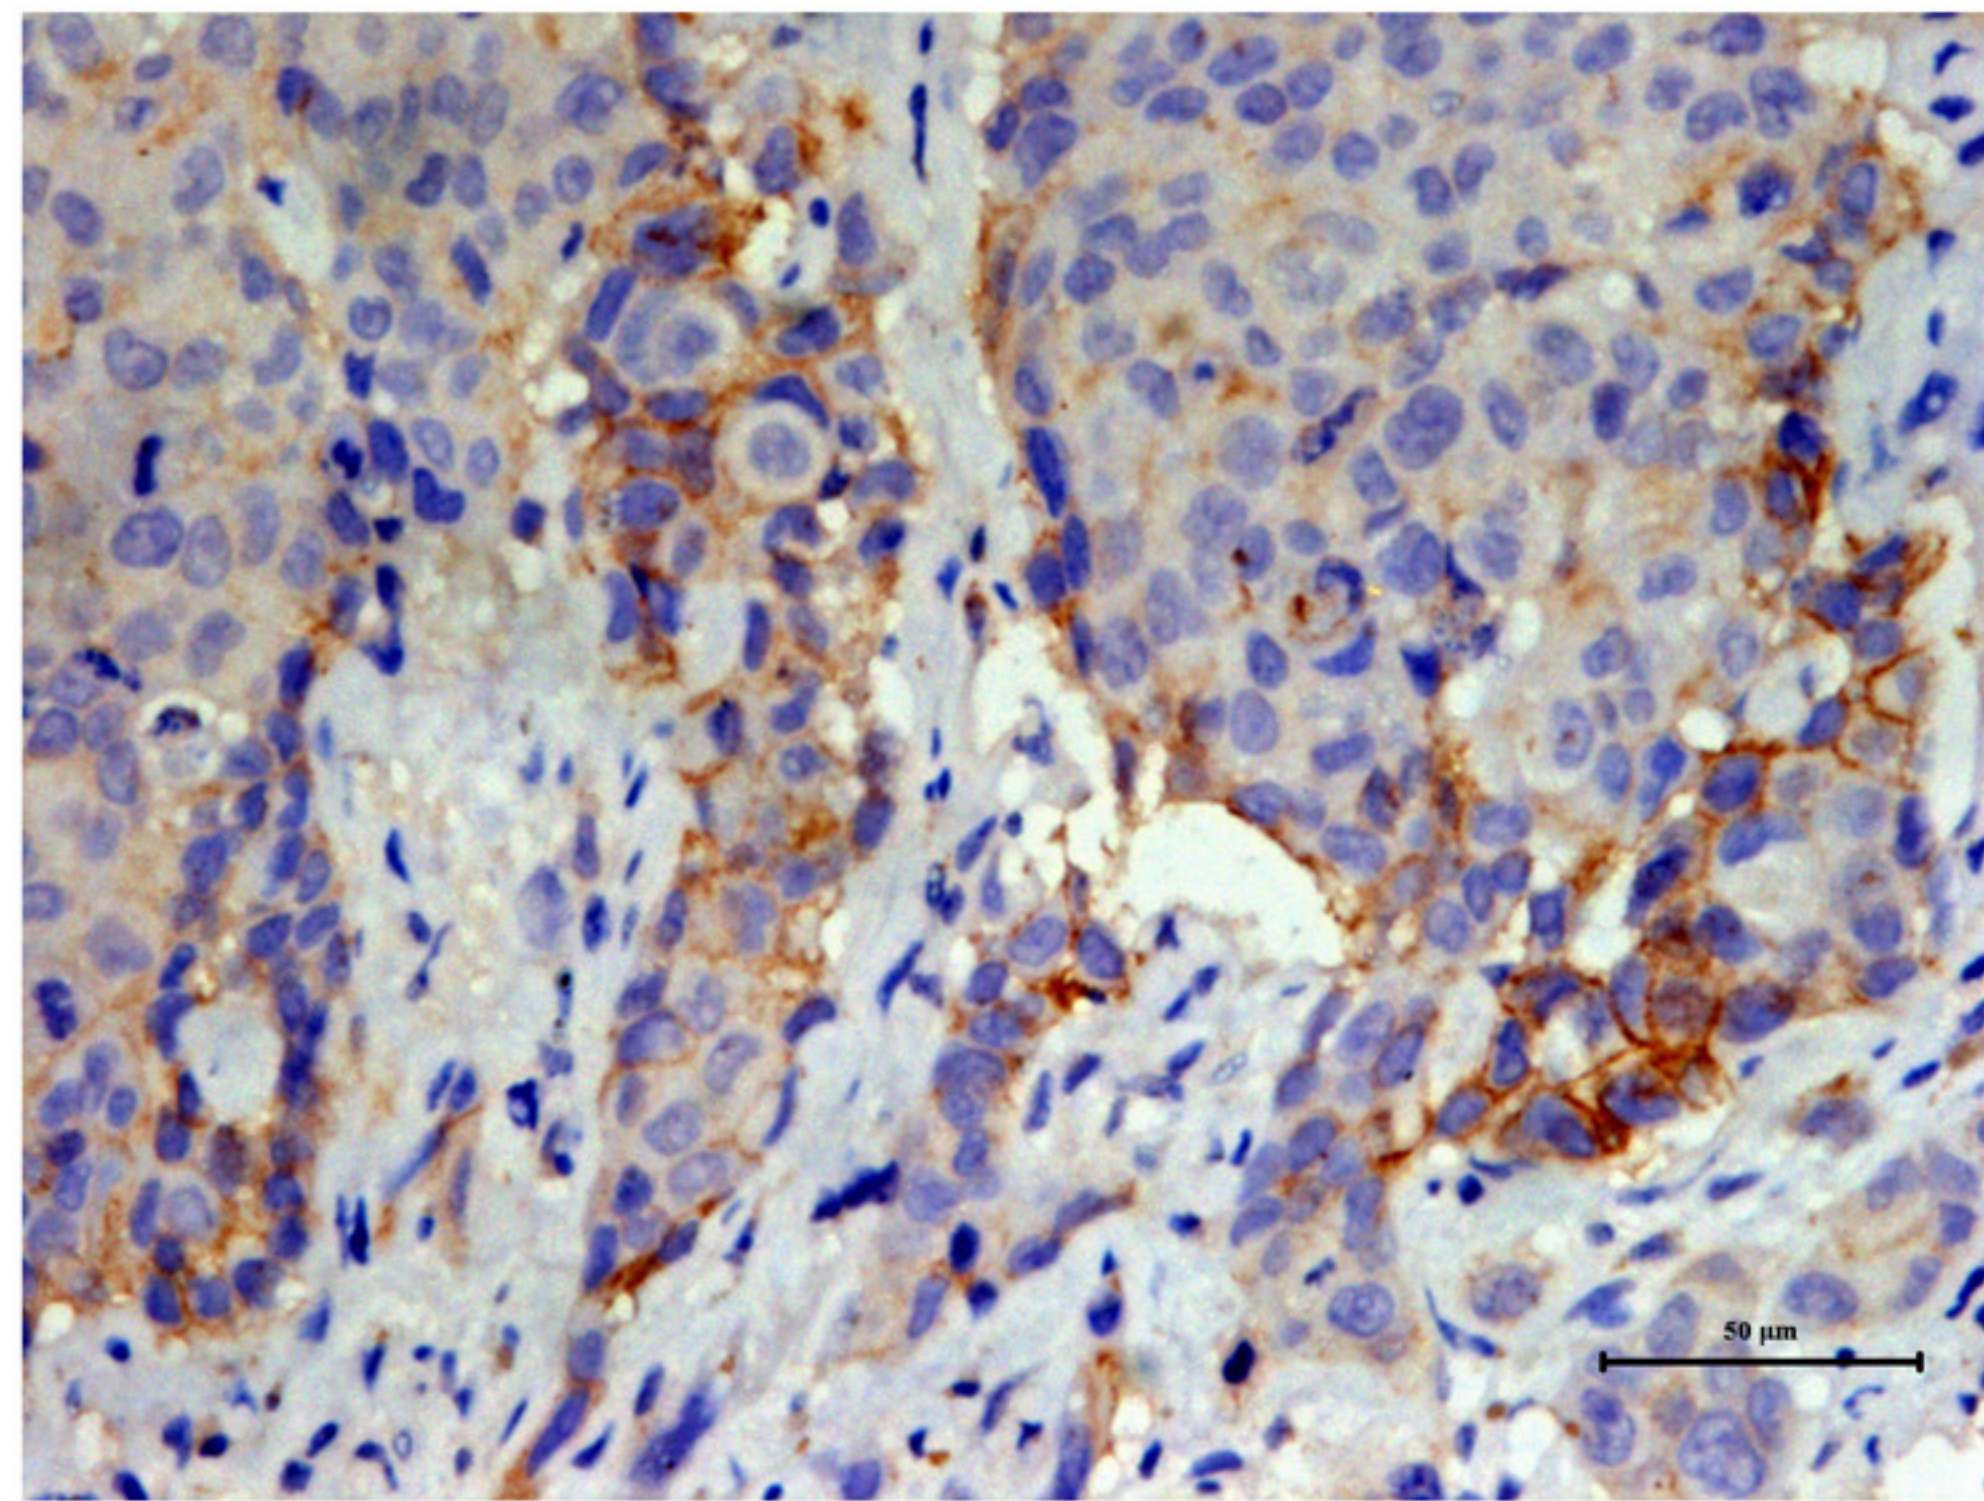

Vimentin

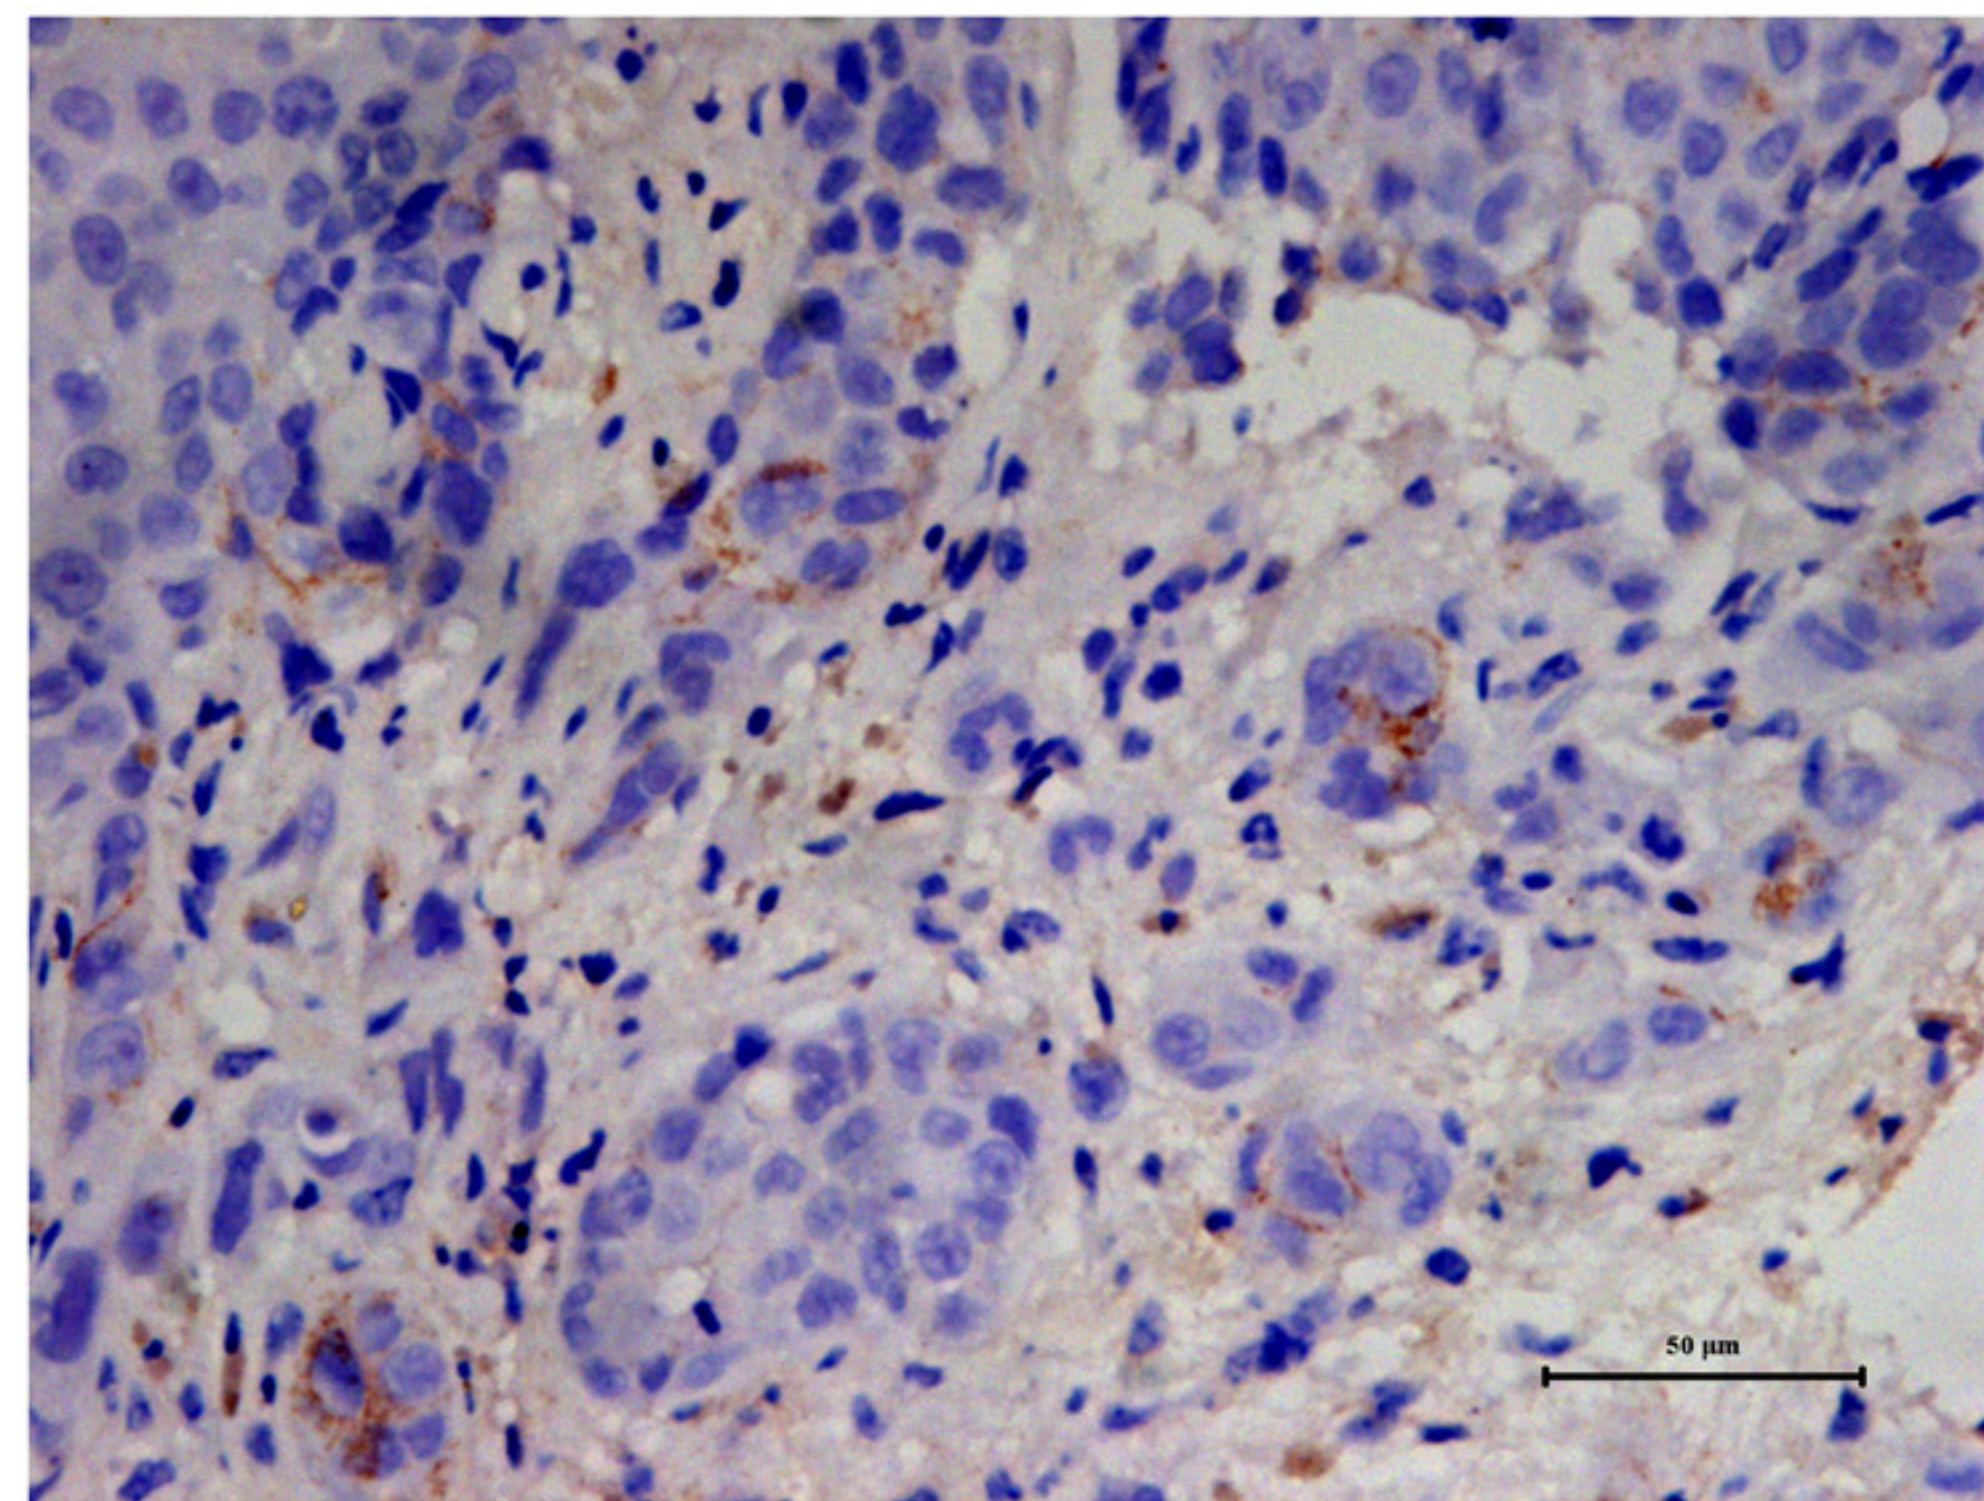

Snail

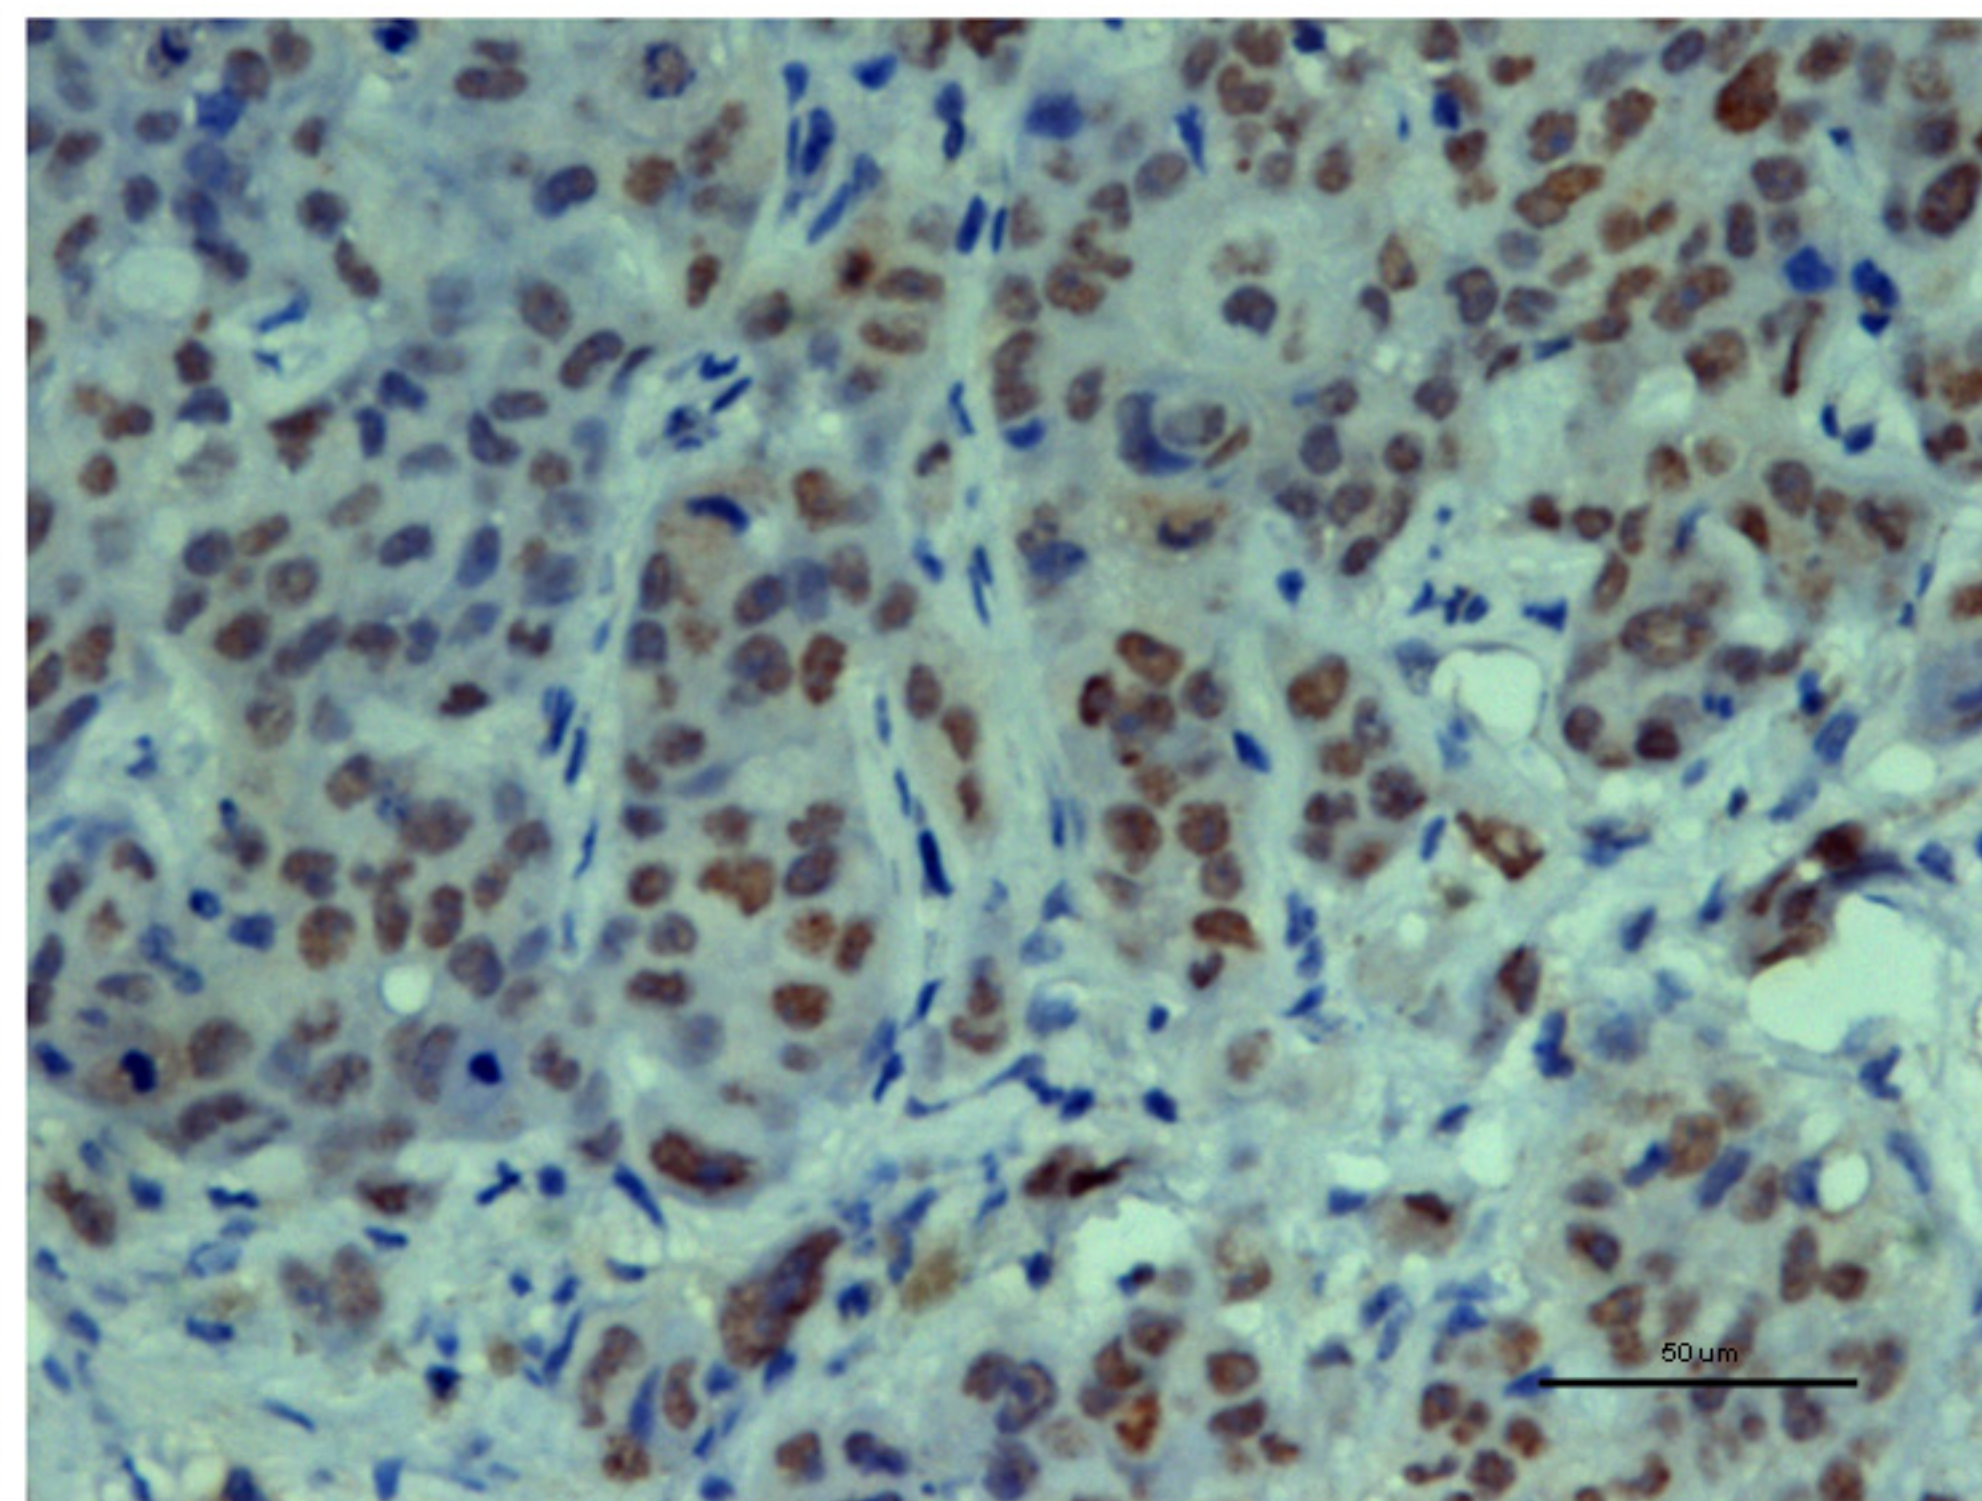

Oxaliplatin-treated tumor  
(400×)

Untreated tumor  
(400×)

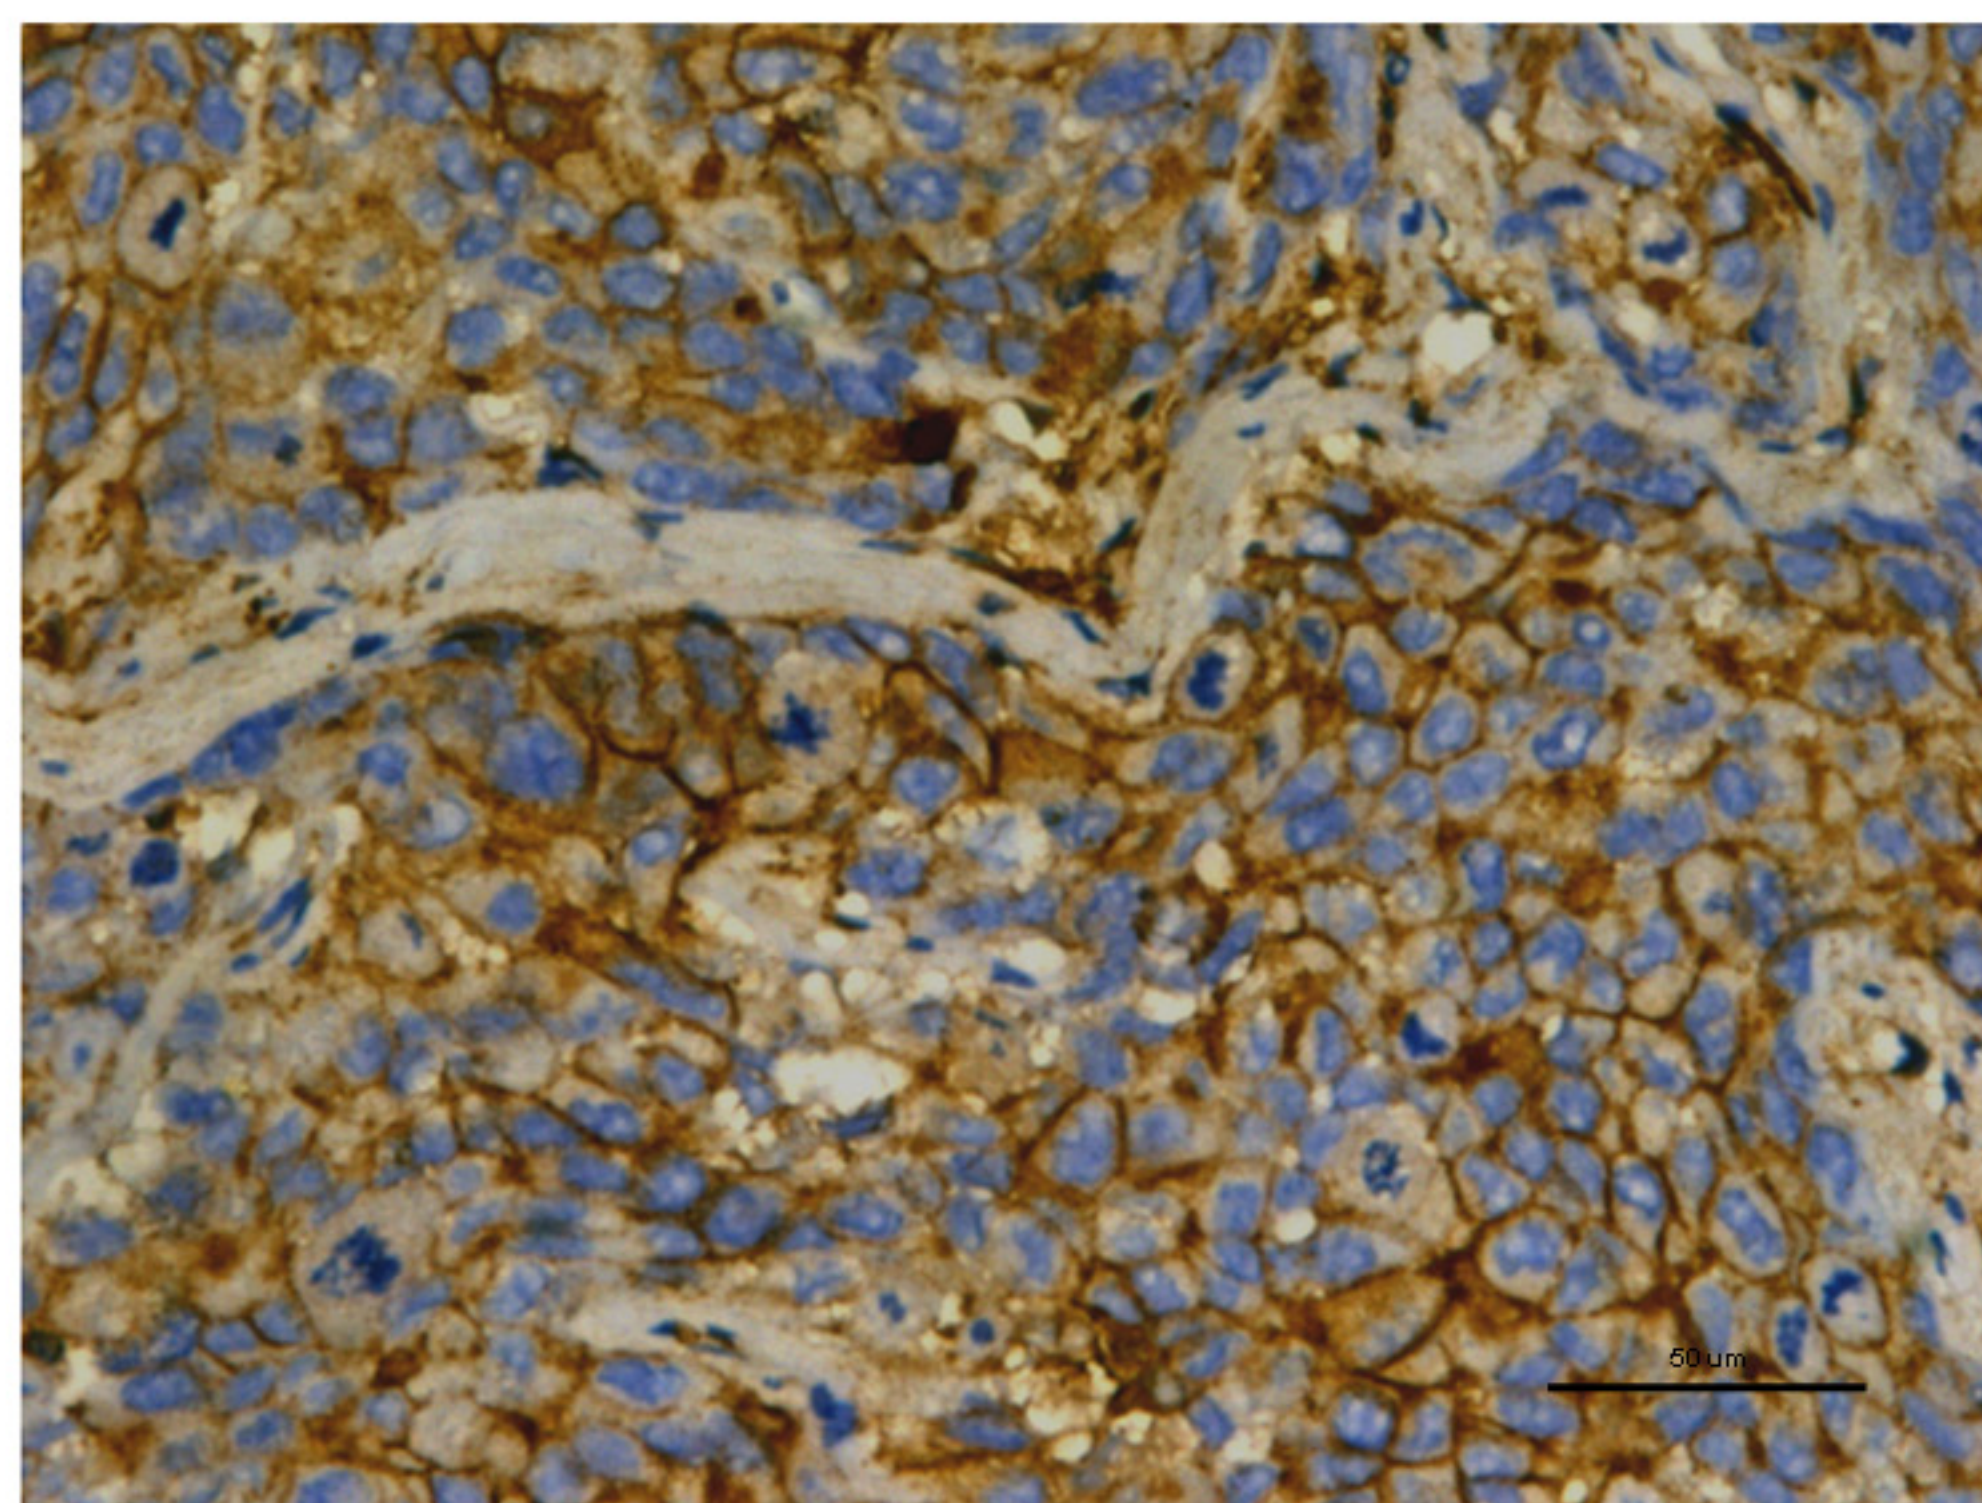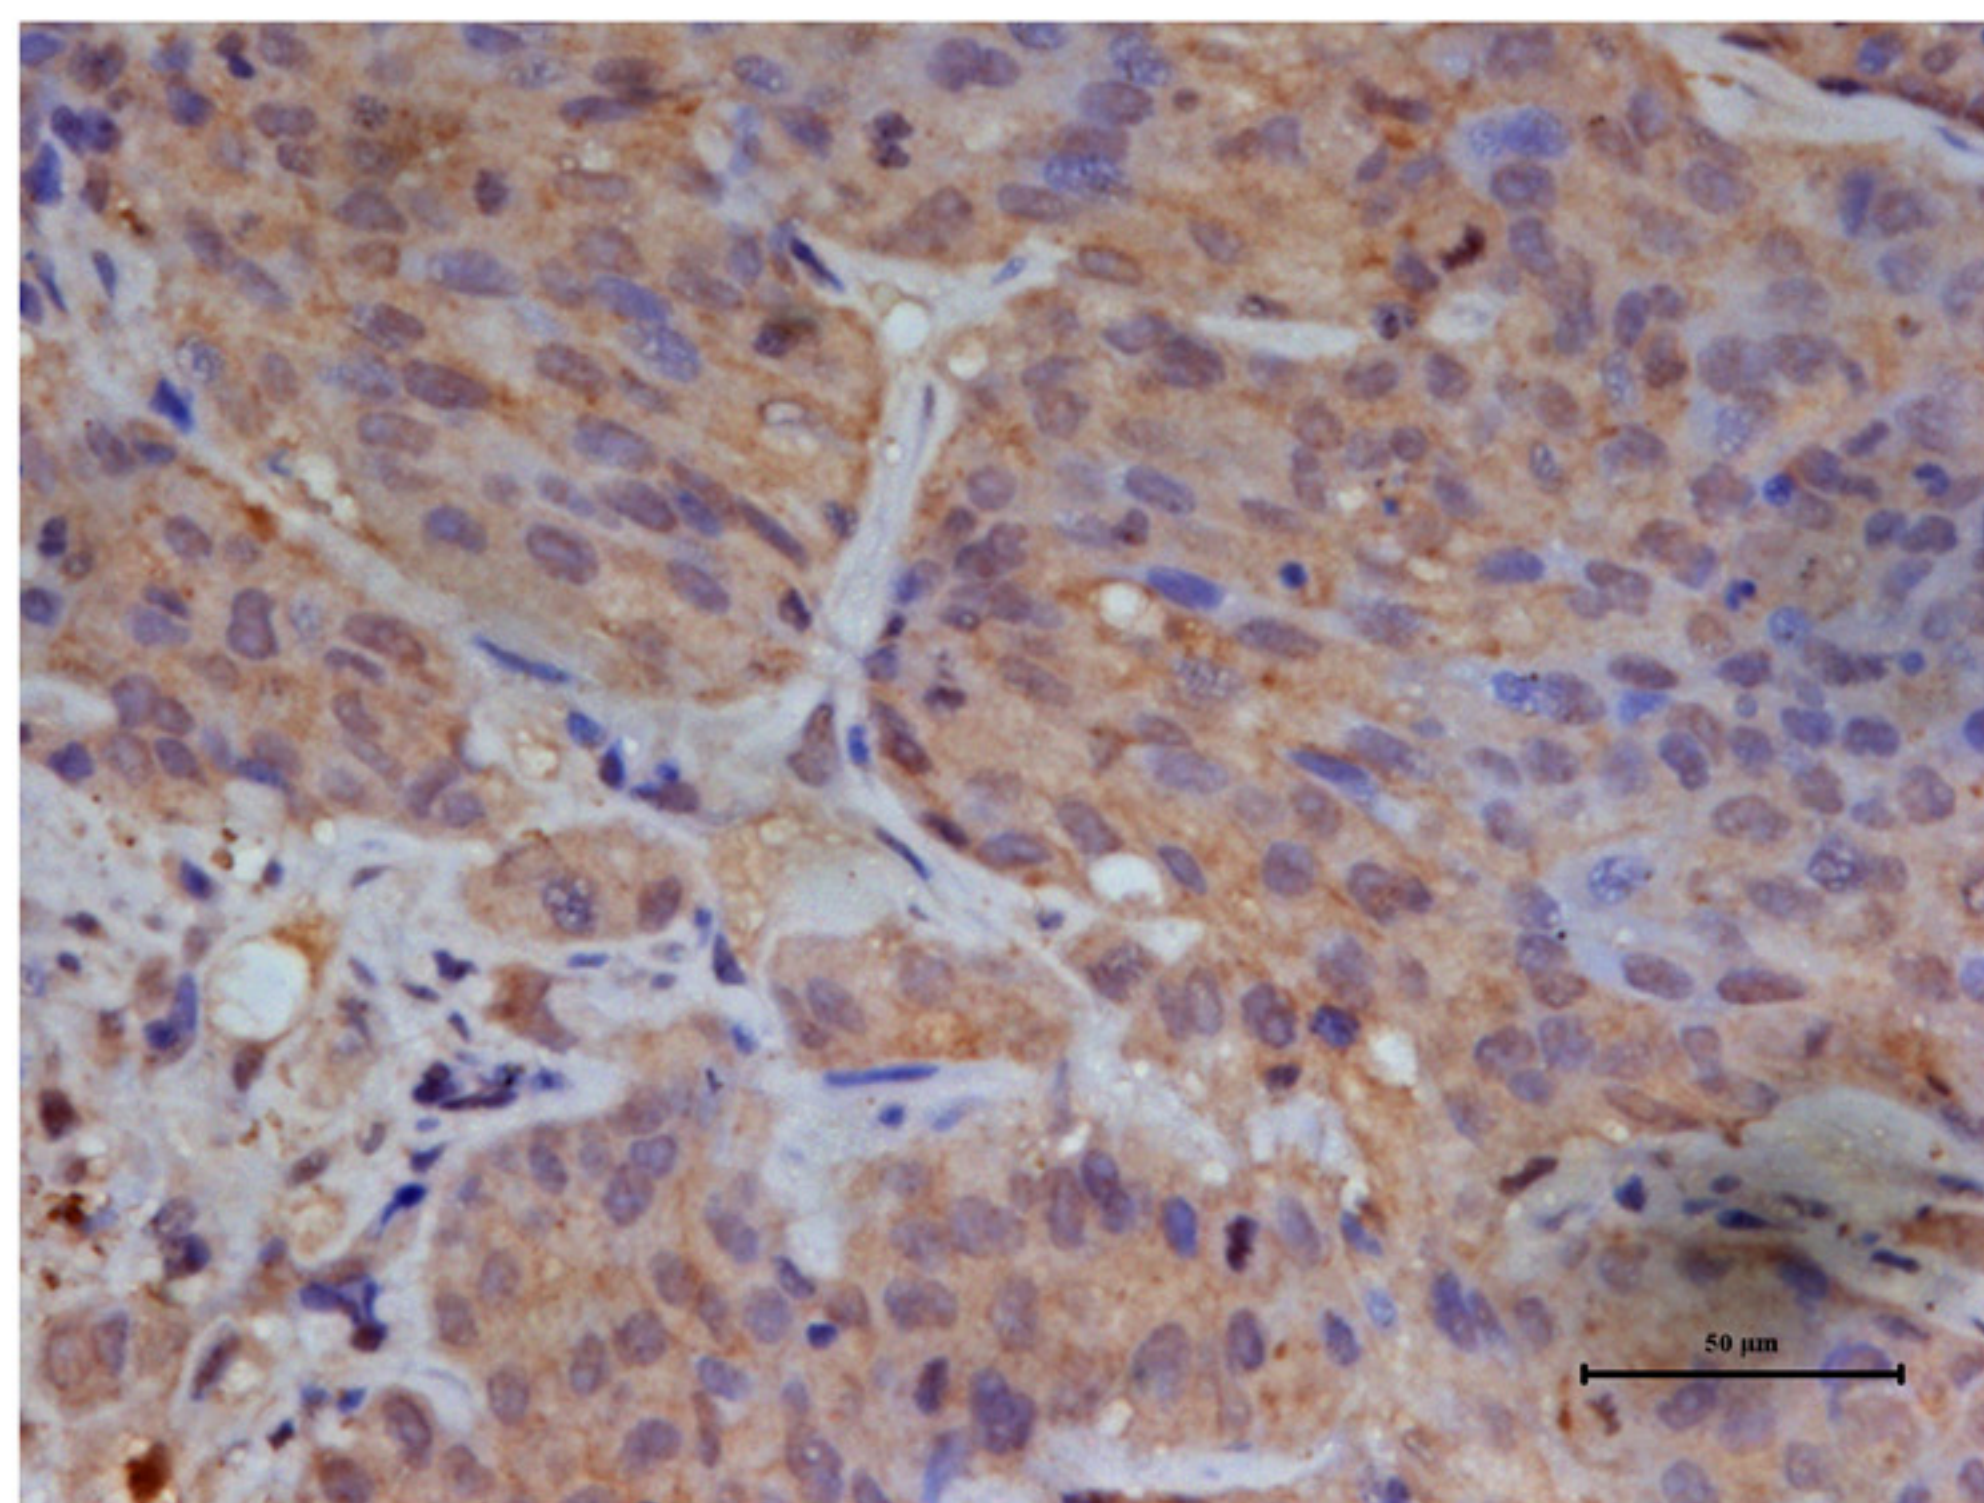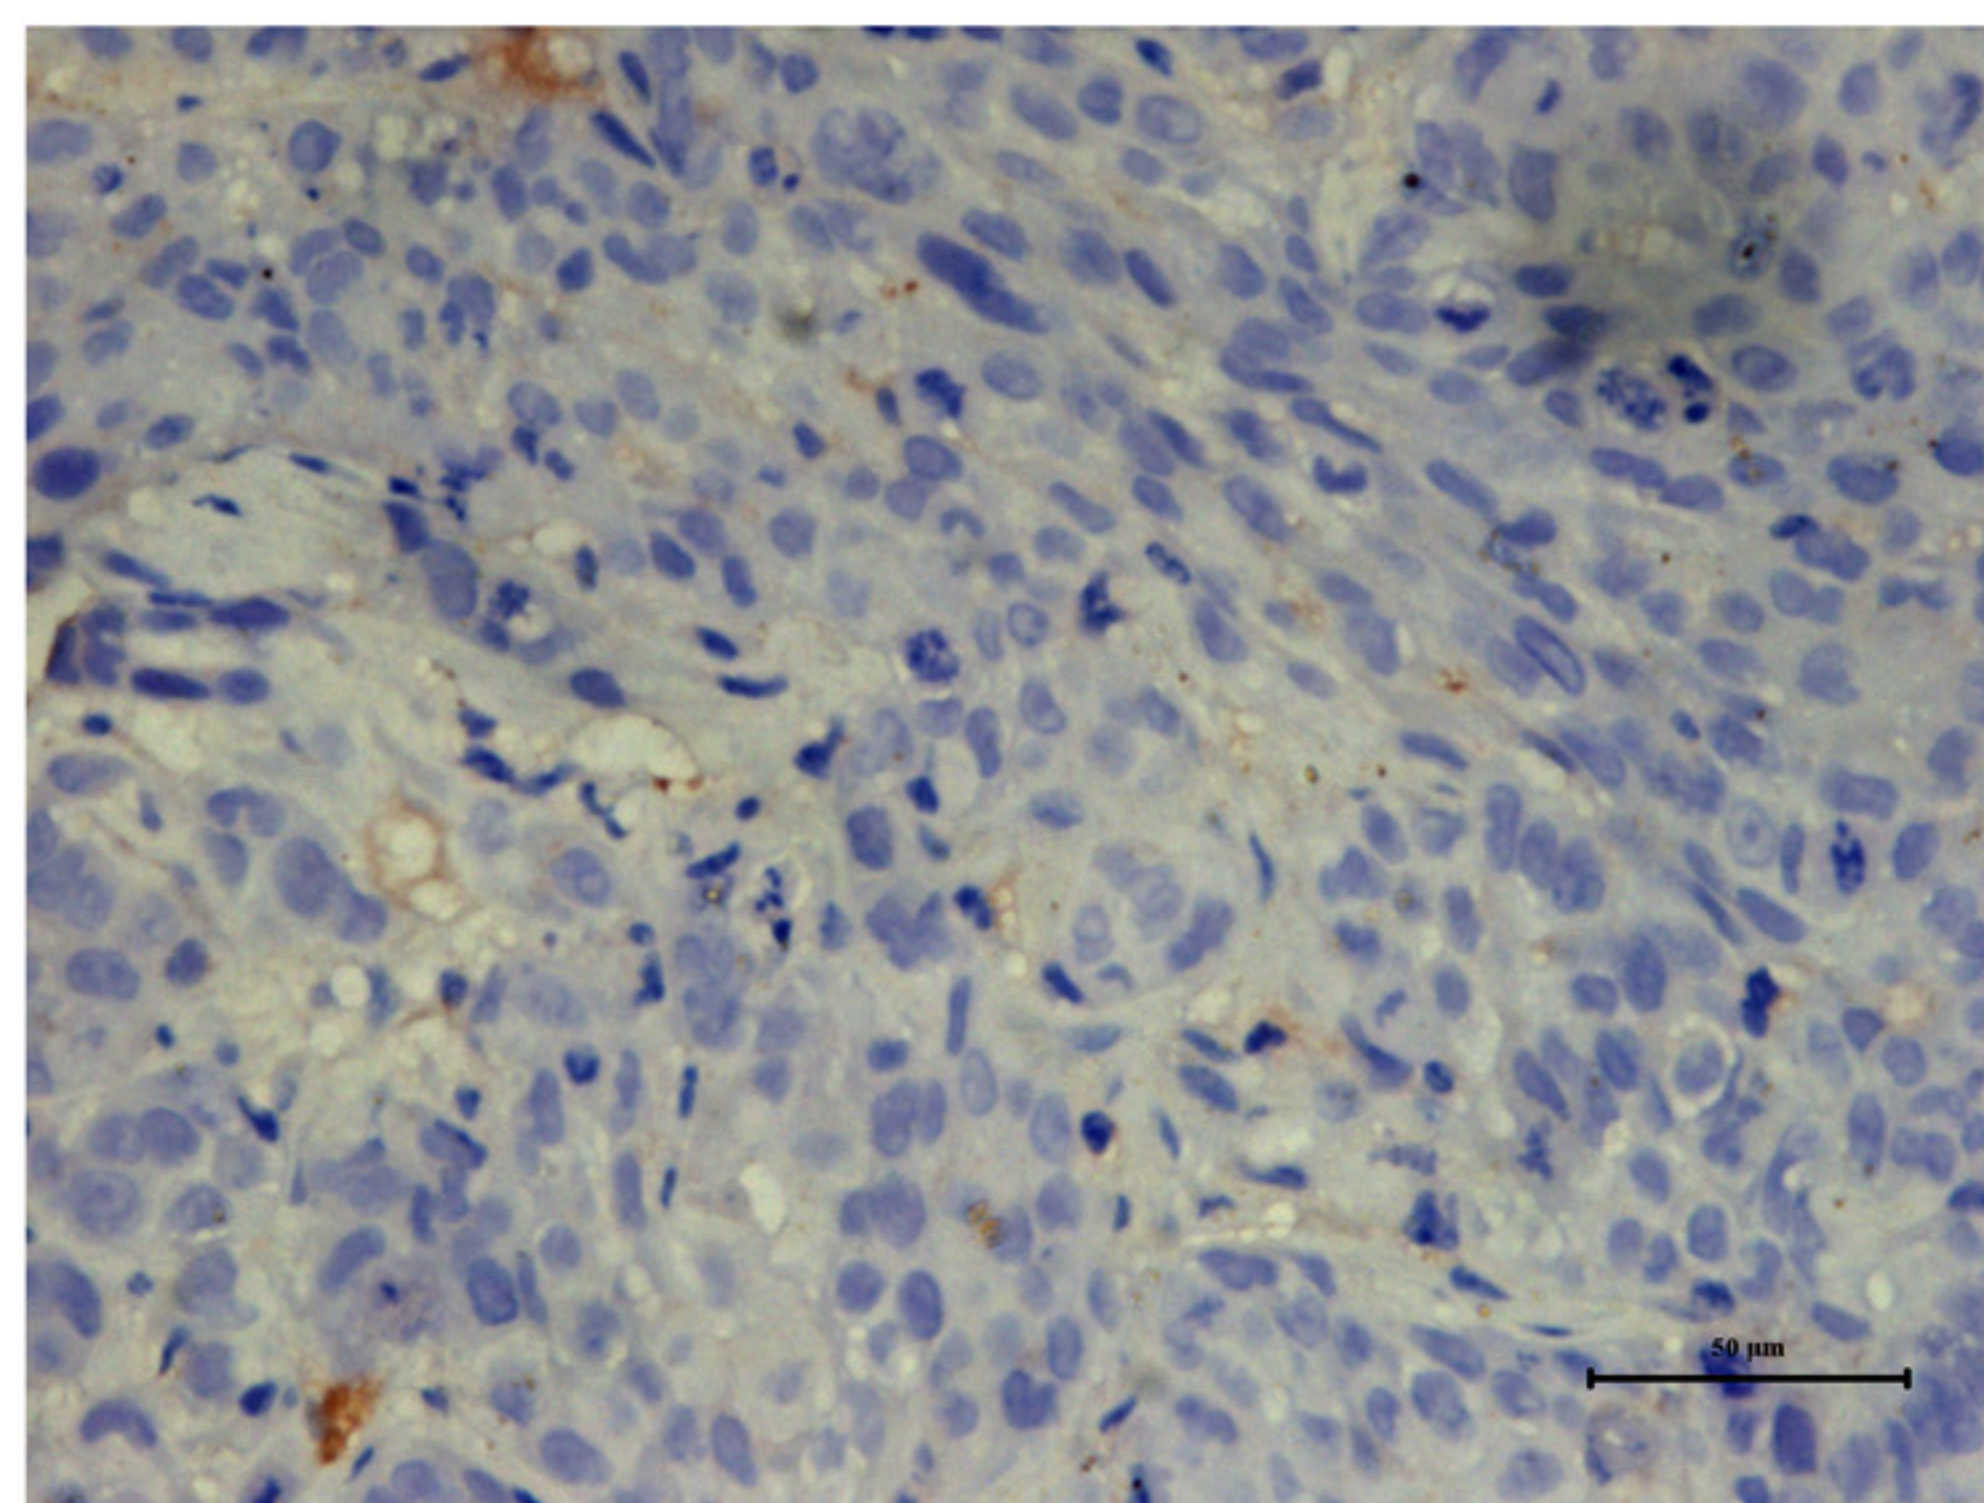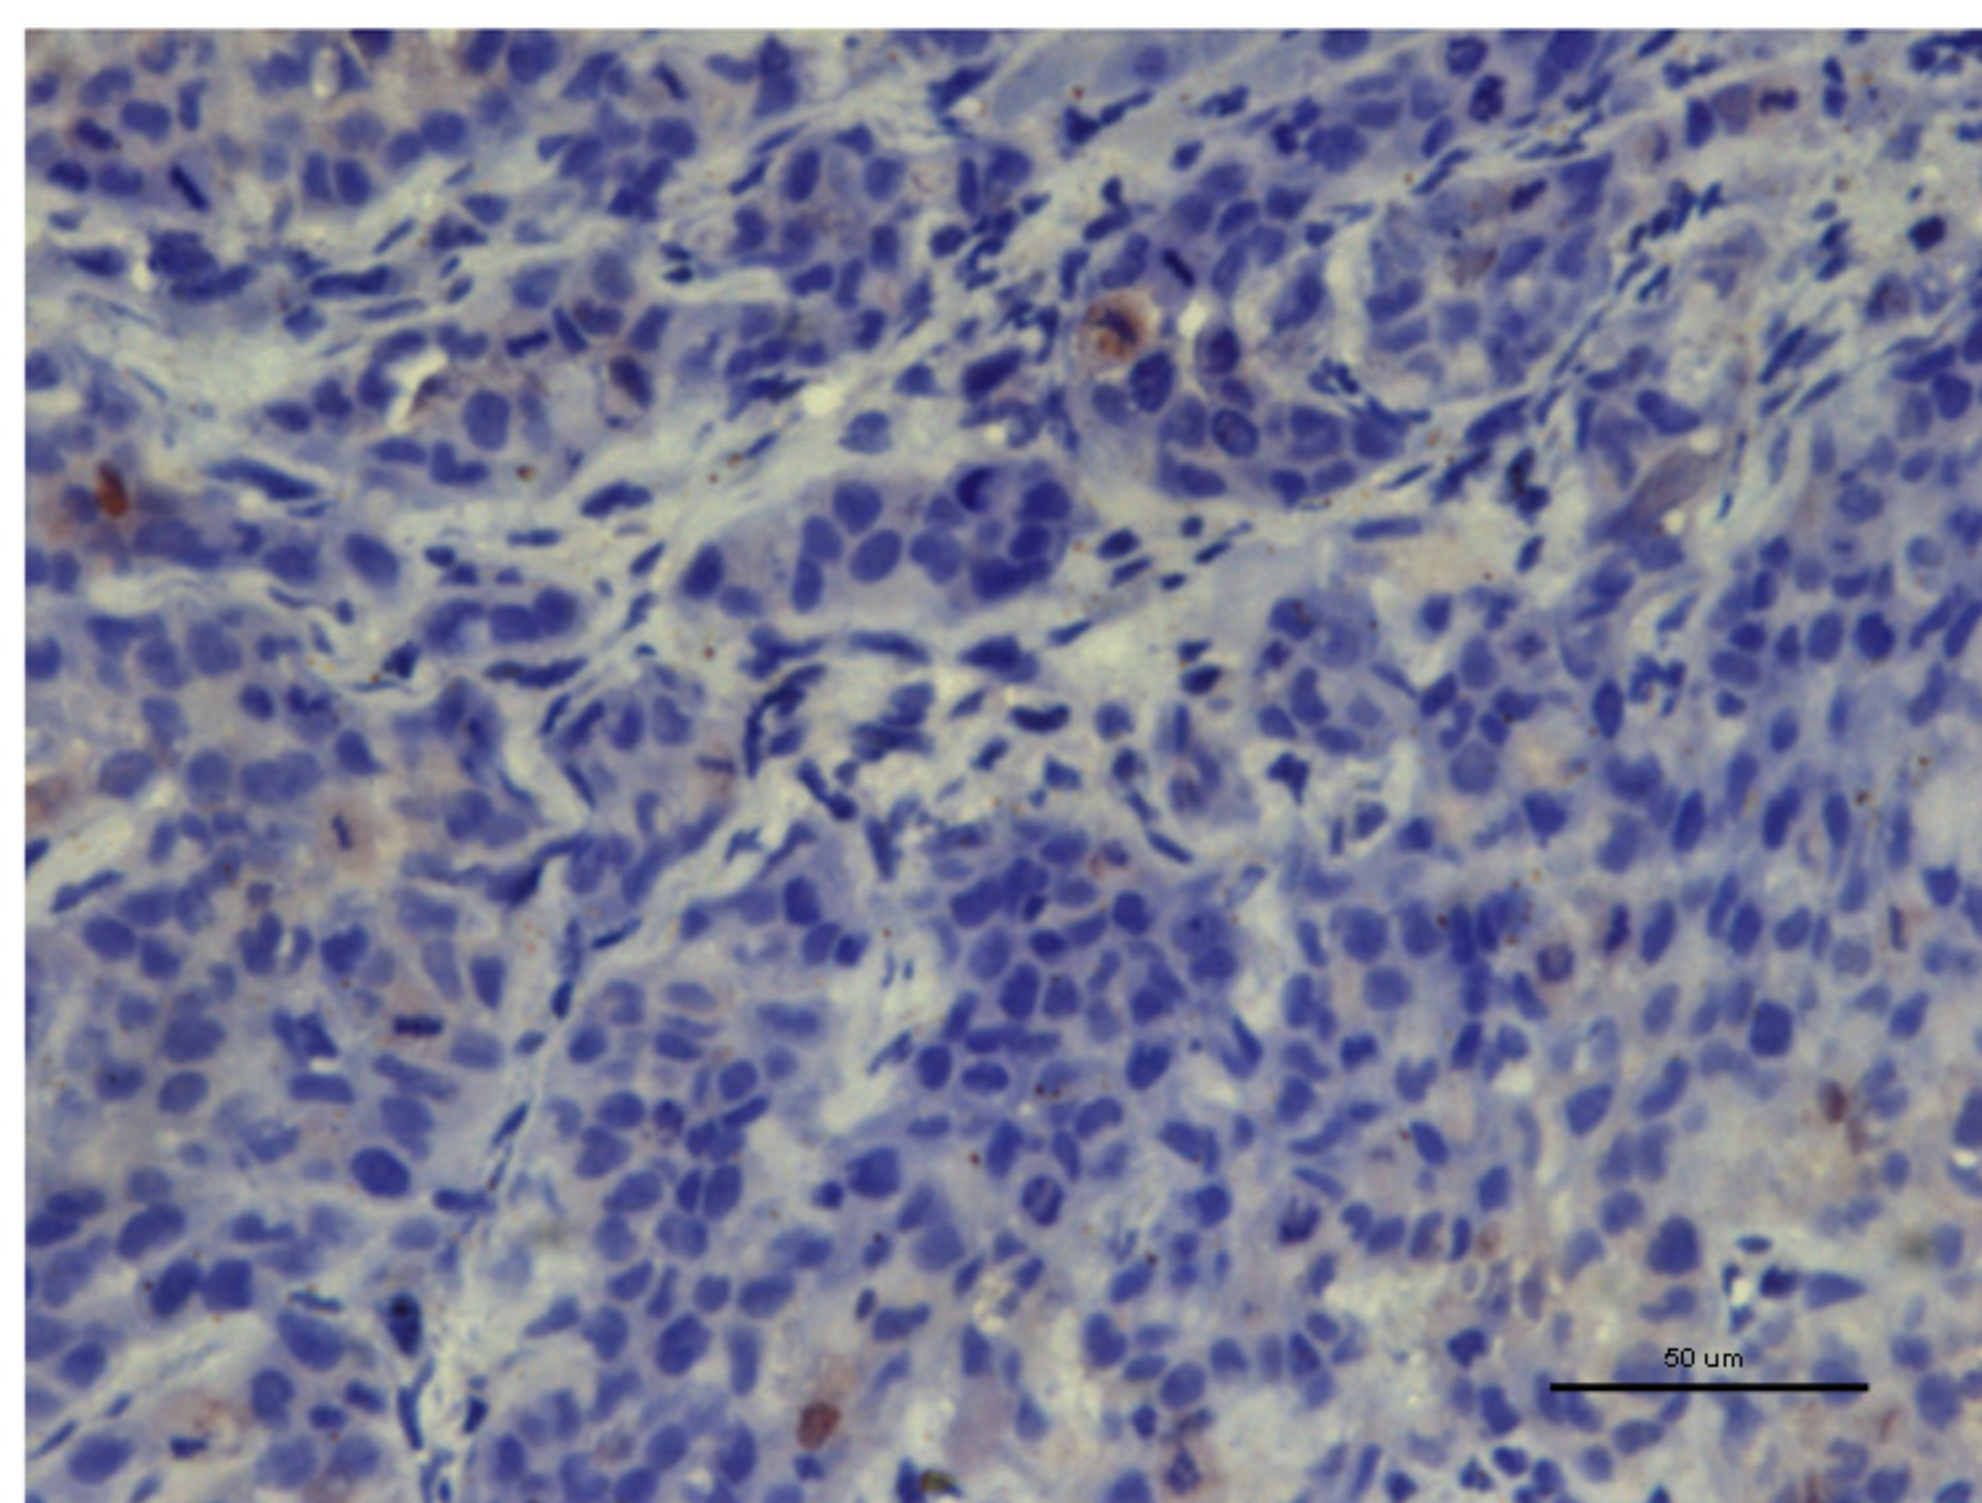

Supplement: MOESM9 [file 9460322]
